# Supplementary material
Source: bioRxiv or medRxiv preprint supplement (https://www.biorxiv.org/highwire/filestream/1651/field_highwire_adjunct_files/0/006627-1.pdf)
Supplement: Supplementary file [file 006627-1.pdf]

## Supplementary Figures

### Supplementary Figure 1: Summary of SRST2 approach

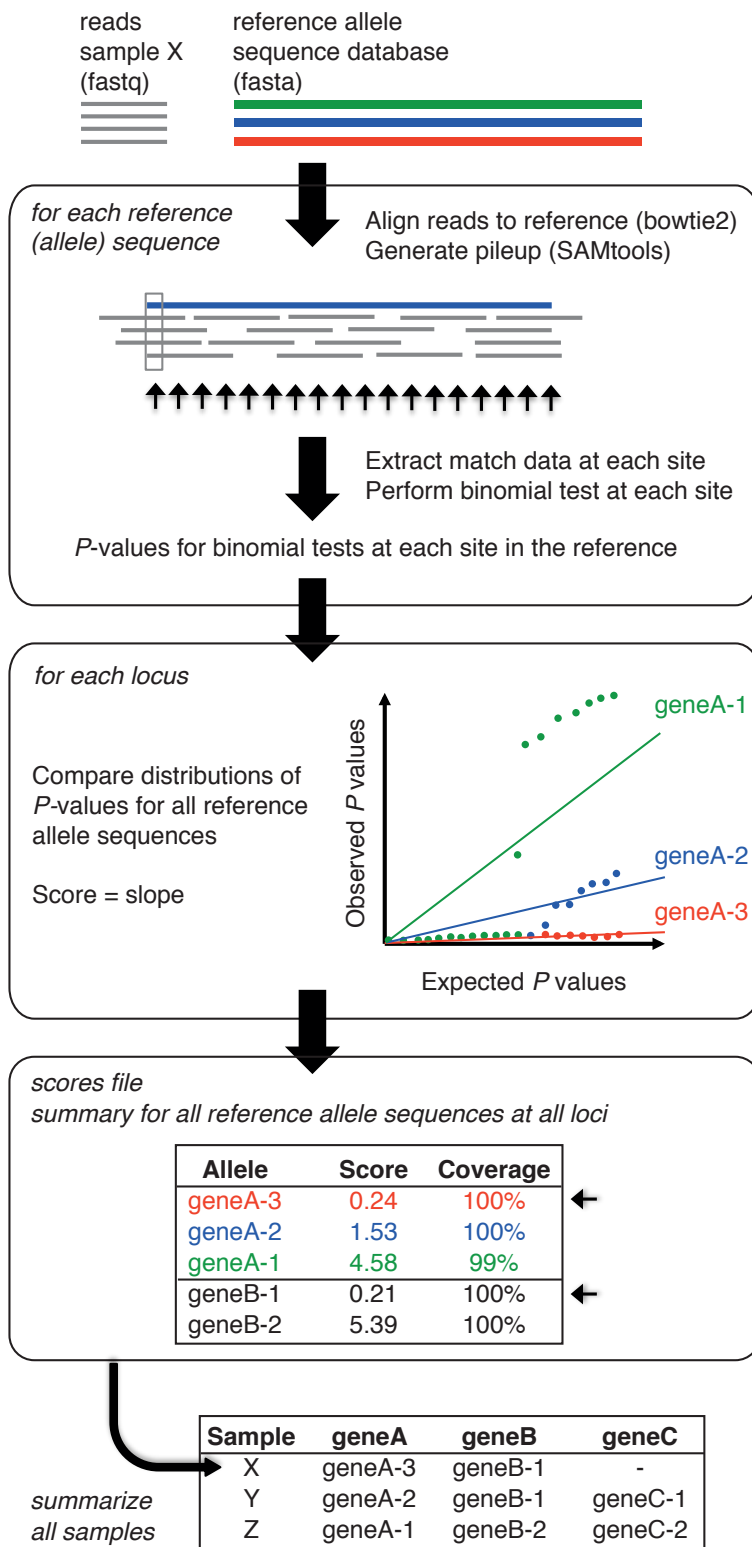

## Supplementary Figure 2: Run times for MLST analysis with SRST2

Lines are linear regression of runtime on reads, calculated separately for each species from public datasets (details in **Supplementary Table 1**).

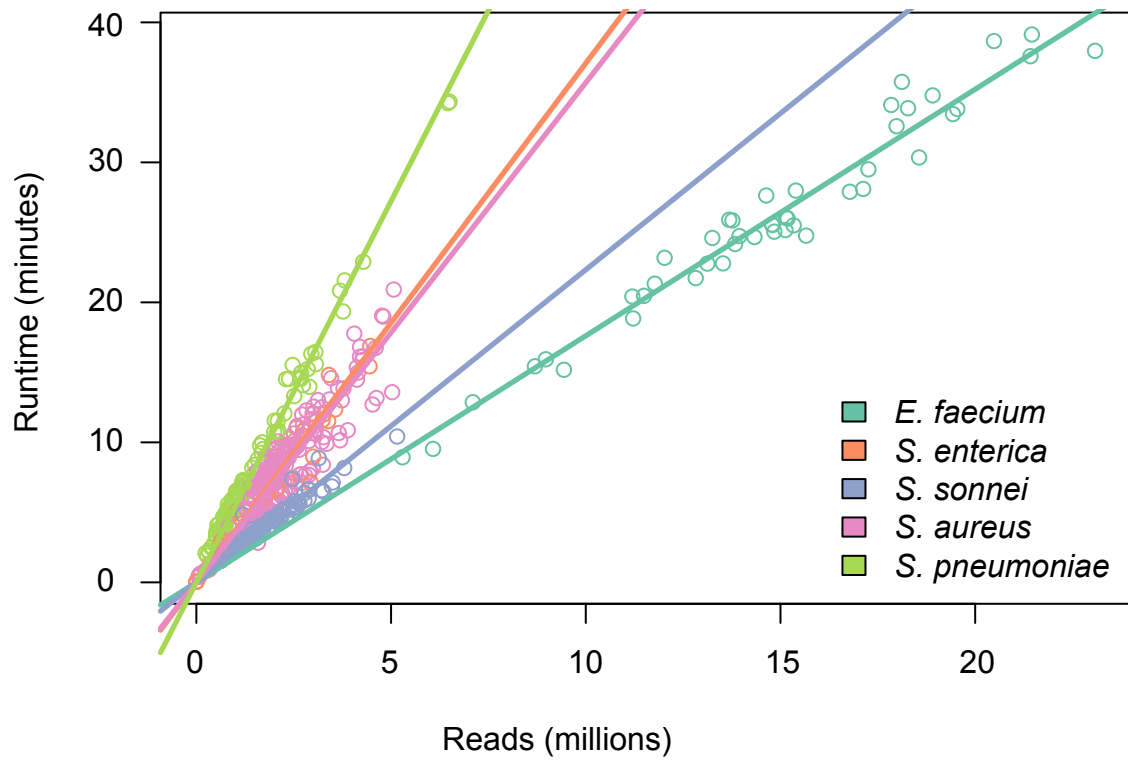

### Supplementary Figure 3: Accuracy of allele calling using SRST2 vs assembly and BLAST

MLST analysis of public data from 5 species (N=543 genomes, 3801 loci, details Supplementary Table 1). Tests were grouped by read depth and accuracy rates (left y-axis, correct allele calls as a proportion of tests), calculated at each depth (x-axis, red slashes indicate scale change). Grey bars, number of tests at each depth (right y-axis); Lines, accuracy of allele calling. **(A)** Call rate (total allele calls / 3801). **(B)** True positive rate (correct allele calls / total allele calls).

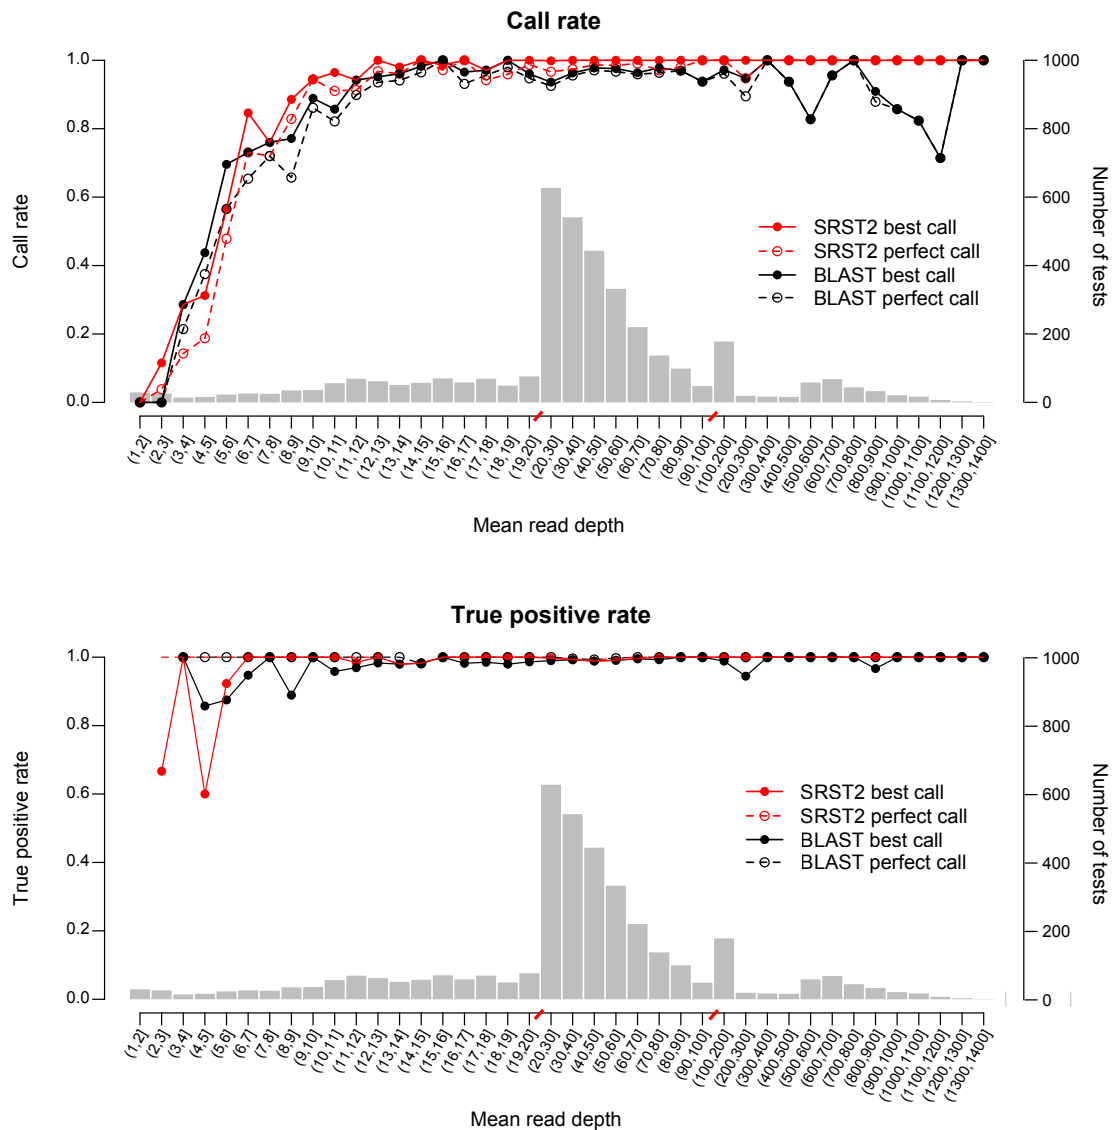

#### Supplementary Figure 4: Accuracy of SRST2 allele calling at low read depths and with expanded MLST database size

MLST analysis of public *S. aureus* data. (N=10 read sets; each sampled 100 times to different depths; details in Methods). Tests were grouped by read depth and accuracy rates (y-axis, correct allele calls as a proportion of all tests), calculated at each depth (x-axis, red slashes indicate scale change from 1x to 10x). Red, real *S. aureus* MLST database; blue, expanded *S. aureus* MLST database (see Methods); grey, unsampled data from 5 species mapped to real databases (as shown in **Fig. 1, S1**).

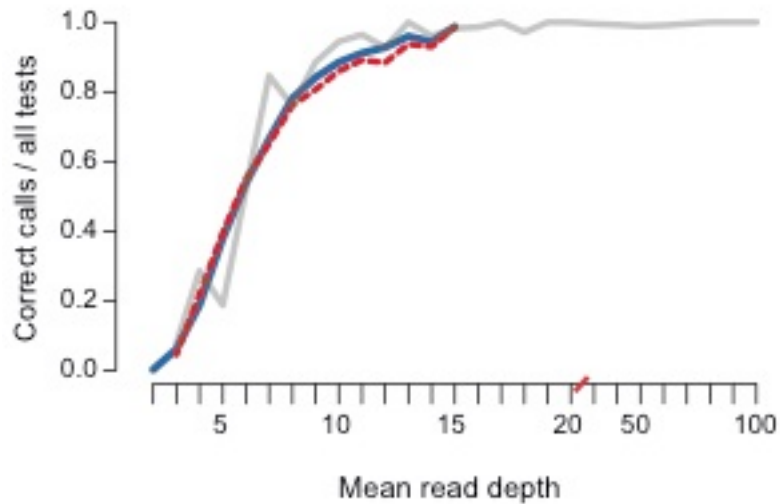

## Supplementary Figure 5: Resistance gene detection

(A) Venn diagram of antimicrobial resistance genes detected by SRST2 and assembly+BLAST, where the threshold for 'detection' of a gene is  $\geq 90\%$  coverage and  $\geq 90\%$  identity with a reference allele. No genes were detected by assembly+BLAST but not SRST2. (B) Distribution of average read depths per gene, calculated by SRST2 from mapped reads, for all genes detected by SRST2. (C) Coverage and nucleotide identity (%ID), as calculated by SRST2, for all genes detected by SRST2 but not by assembly+BLAST. (D) Impact of lowering the coverage threshold for detection of genes by BLAST (for those genes with  $\geq 15x$  read depth).

**A Gene detection**  
( $\geq 90\%$  coverage and  $\geq 90\%$  identity)

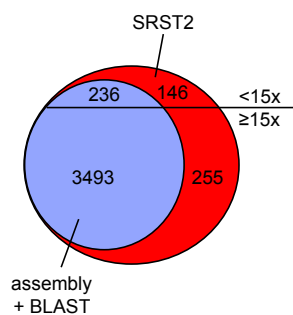

**B Genes detected by SRST2 at  $\geq 90\%$  coverage and  $\geq 90\%$  identity**

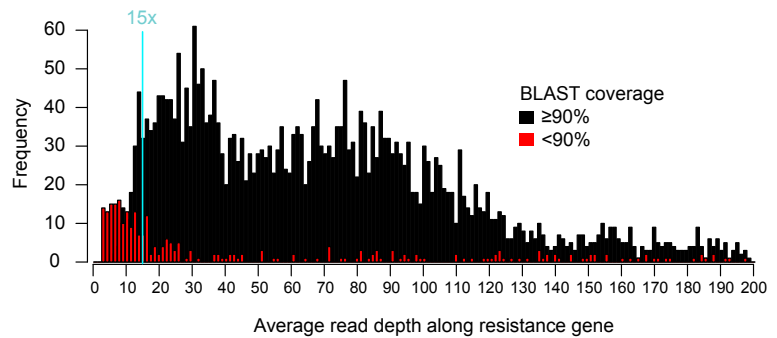

**C Properties of genes detected by SRST2 but not BLAST**

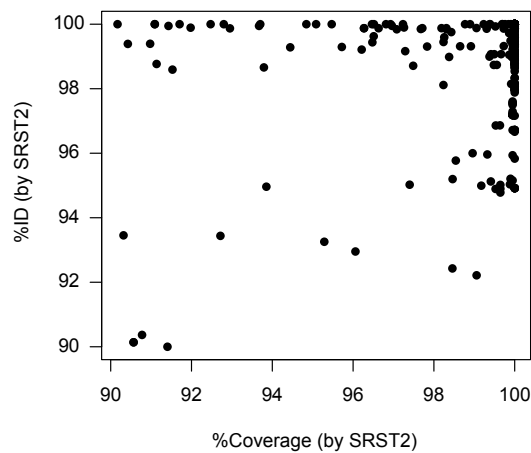

**D Detection of gene fragments from assemblies**  
(read depth  $\geq 15x$ )

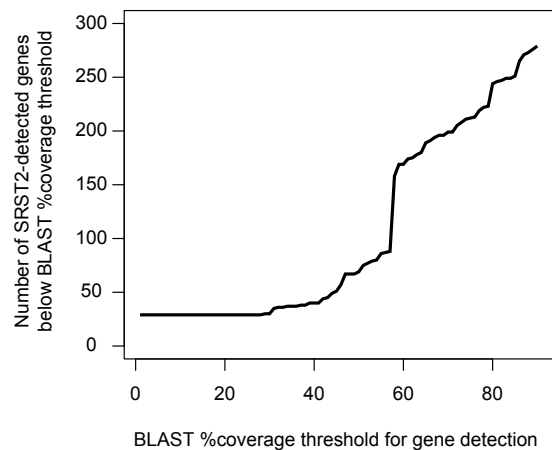

## Supplementary Figure 6: SRST2 analysis of sequence types and beta-lactamase CTX-M-15 genes amongst hospital isolates

Rates of isolation of different sequence types (STs), coloured by CTX-M-15 status, as determined by SRST2 run with default parameters on a public data set of strains from a single hospital. In each species, a single known ST dominates the population (highlighted) and is also the dominant source CTX-M-15 genes.

A ‘\*’ next to an ST indicates a match to the closest defined ST; i.e., that for all 7 loci the closest known allele is the one belonging to that ST, however at  $\geq 1$  these loci there is an imprecise match (SNP or indel) compared to the known allele sequence. ‘Novel’ indicates a novel sequence type resulting from a combination of known alleles, with precise matches at all loci (‘NF’ in SRST2 output); ‘Novel\*’ indicates a novel combination of alleles, with  $\geq 1$  of those alleles being novel itself (i.e. with no exact match in the MLST database) (‘NF\*’ in SRST2 output).

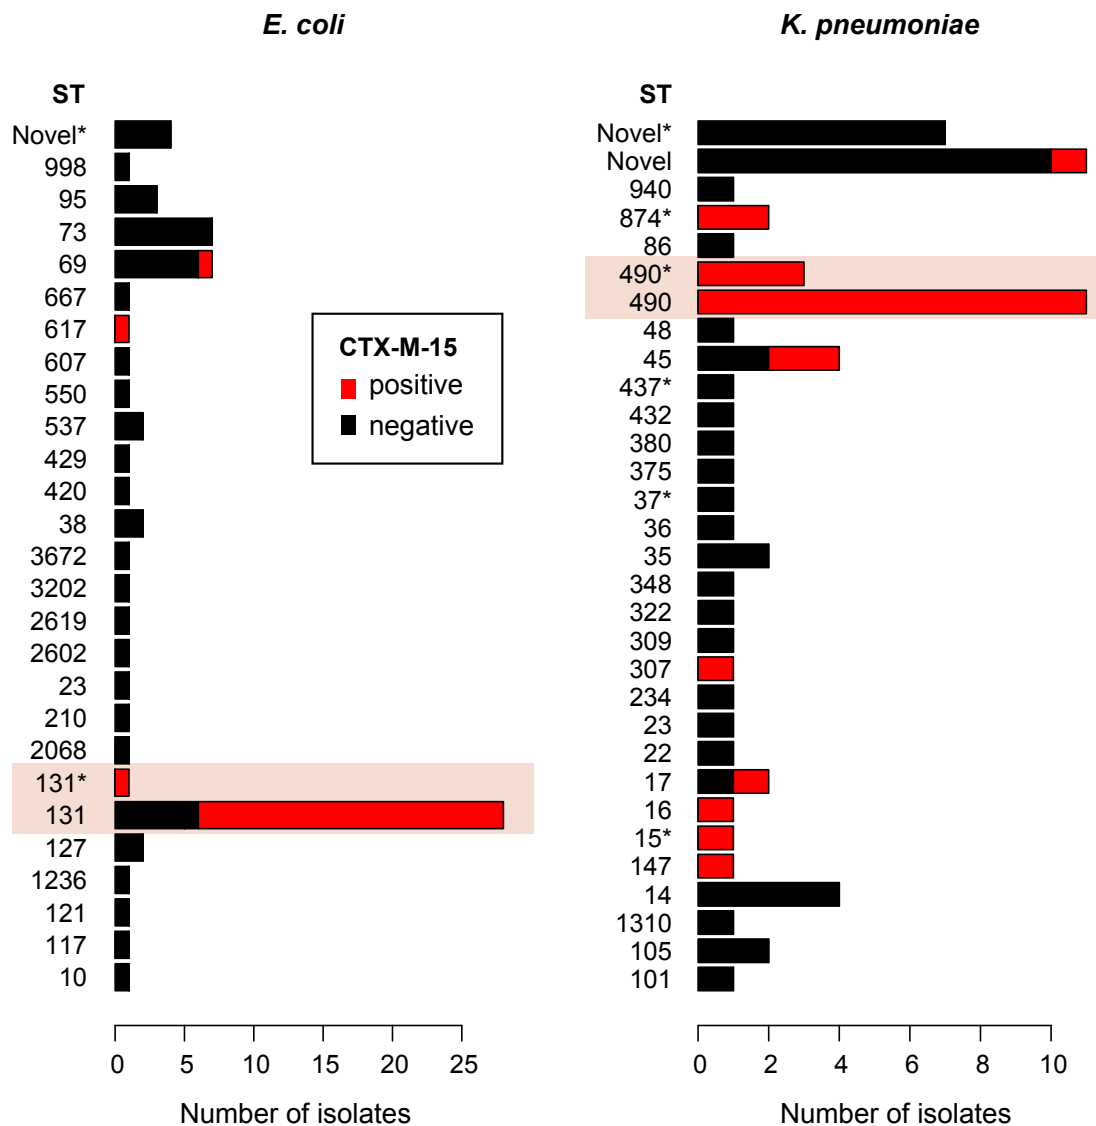

## Supplementary Table 1

### (A) Validation data

| Species                                | Citation                                                     | N   | Population                        | Sequencing Centre    | Average read depth | Read length |
|----------------------------------------|--------------------------------------------------------------|-----|-----------------------------------|----------------------|--------------------|-------------|
| <i>Staphylococcus aureus</i>           | Holden et al, <i>Genome Res</i> 2013, 23(4):653-64           | 134 | Clonal, ST22                      | Sanger, UK           | 24x                | 55          |
| <i>Staphylococcus aureus</i>           | Castillo-Ramirez et al, <i>Genome Biol</i> 2012, 13(12):R126 | 128 | Clonal, ST239                     | Sanger, UK           | 60x                | 65          |
| <i>Streptococcus pneumoniae</i>        | Croucher et al, <i>Science</i> 2011, 331(6016):430-4         | 113 | Clonal, ST81                      | Sanger, UK           | 30x                | 55          |
| <i>Salmonella enterica</i> Typhimurium | Okoro et al, <i>Nat Genet</i> 2012, 44(11):1215-21           | 44  | Clonal, ST313                     | Sanger, UK           | 34x                | 76          |
| <i>Shigella (E. coli)</i>              | Holt et al, <i>Nat Genet</i> 2012 44(9):1056-9               | 81  | Clonal, <i>S. sonnei</i>          | Sanger, UK           | 25x                | 55          |
| <i>Enterococcus faecium</i>            | Howden, 2013 [14]                                            | 43  | Diverse, dominated by ST203, ST17 | Melbourne, Australia | 658x               | 101         |
| <i>Listeria monocytogenes</i>          | This paper                                                   | 231 | Diverse                           | Melbourne, Australia | 36x                | 152         |

### (B) Demonstration data (public)

| Species                                     | Citation          | N      | Average read depth | Read length |
|---------------------------------------------|-------------------|--------|--------------------|-------------|
| <i>Enterococcus faecium</i> (Fig 2a-c)      | Howden 2013 [14]  | 43     | 658                | 101         |
| Hospital outbreak investigations (Fig 2d-e) | Reuter, 2013 [5]  | 20     | 36x                | 151         |
| <i>K. pneumoniae, E. coli</i>               | Stoesser 2013 [6] | 69, 74 | 34x                | 101         |
